# Supplementary material for: A highly efficient room-temperature NO2 gas sensor based on three-dimensional core–shell structured CoS2 bridged Co3O4@MoS2
Source: Royal Society of Chemistry journal article supplement (doi:10.1039/d3nj03629d), 2023-01-01
Supplement: d3nj03629d1.pdf [file d3nj03629d1.pdf]

### Supporting information

#### Highly Efficient Room-Temperature NO<sub>2</sub> Gas Sensor Based on Three-Dimensional Core-Shell Structured CoS<sub>2</sub> Bridging Co<sub>3</sub>O<sub>4</sub>@MoS<sub>2</sub>.

Haiyang Chang<sup>a,b</sup>, Jiahui Fan<sup>b</sup>, Kejian Yang<sup>a,\*</sup>, Cheng Wang<sup>a,b,\*</sup>, Boxuan Zhang<sup>a</sup>, Wanying Zhang<sup>a</sup>, Xudong Chen<sup>a,b,\*</sup>

- a. Key Laboratory of Functional Inorganic Material Chemistry, Ministry of Education. School of Chemistry and Material Science, Heilongjiang University, Harbin, 150080, P. R. China.
- b. Guangdong Laboratory of Chemistry and Fine Chemical Engineering Jieyang Center, Jieyang 515200, China E-mail: yang\_771172@163.com; wangc\_93@gdut.edu.cn; chenxd@gdut.edu.cn

## Physical characterization

The phase constituents of the as-products were analyzed by X-ray diffraction (XRD, D/MAX IIB-40KV, Japan) with Cu-K radiation,  $\lambda = 1.5406 \text{ \AA}$  radiation source. The morphology and surface chemical characteristics of the products were observed with a high-resolution transmission electron microscope (TEM, JEOL 2100). The chemical states of the composites were tested using X-ray photoelectron spectrometry measurements (XPS, VGESCALAB MK II using Mg-Ka (1253.6 eV) achromatic X-ray radiation). Binding energies were referenced to the C 1s peak of the (C-C) bond which set at 284.4 eV. The UV-vis diffuse reflectance spectra (DRS) of the samples were tested on a UV-vis spectrophotometer (UV 2550, using BaSO<sub>4</sub> for the baseline measurement) with an integrating sphere attachment within the 200-800 nm range. All the electrochemical tests were carried out with a CHI-660E electrochemical workstation (Shanghai Chenhua Instruments Limited, China). Electrochemical impedance spectra (EIS) were carried out under laboratory air conditions. For EIS, a lower voltage amplitude (0.2V) was chosen to reduce sample interference and minimize the signal-to-noise ratio, and the frequency range was set to 1-10<sup>6</sup> Hz. A four-electrode system was used, including a working electrode, counter electrode, reference electrode, and auxiliary electrode. The electrical properties of different samples were studied on the gold interleaved electrode. On the other hand, the three-electrode system was used throughout Mott-Schottky (MS) tests, and it was carried out in a 0.1 M Na<sub>2</sub>SO<sub>4</sub> solution. A glass carbon electrode (GCE) covered by the as-fabricated sample was used as a working electrode, a platinum (Pt) plate electrode as a counter electrode, and a saturated calomel electrode as a reference electrode. We indirectly proved the conductivity of the materials themselves by EIS and MS testing. All the electrochemical measurements were carried out at room temperature (23±1°C). The work functions were characterized by Kelvin probe (SKP-5050) at room temperature. Raman

spectroscopy (Jobin-Yvon HR 800 micro-Raman spectrometer) is used for molecular structure analysis. Temperature program desorption (TPD) was carried out by AutoChem TP5080 chemisorption analyzer and using mass spectra (QIC-20, Hidden) to record the TPD signals.

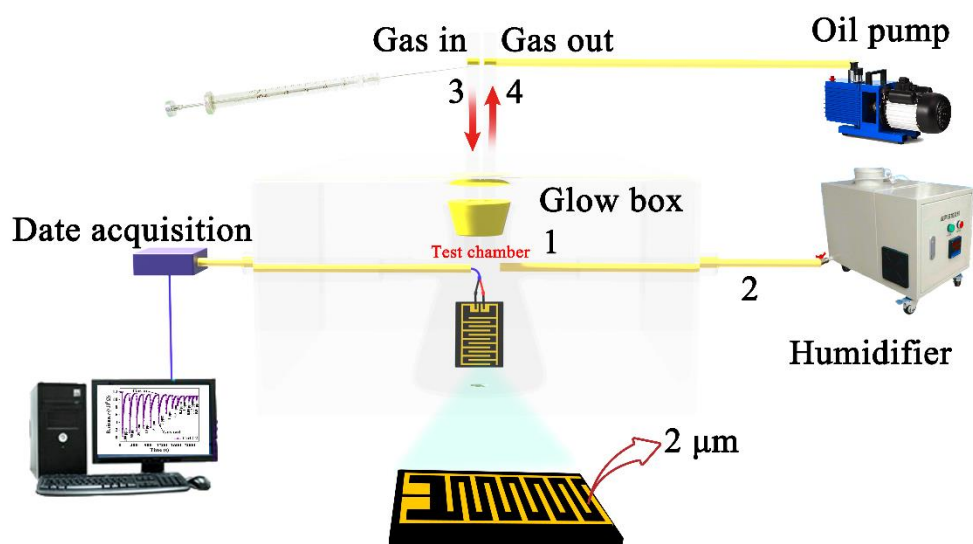

**Scheme S1.** The gas delivery system diagram for the sensing process.

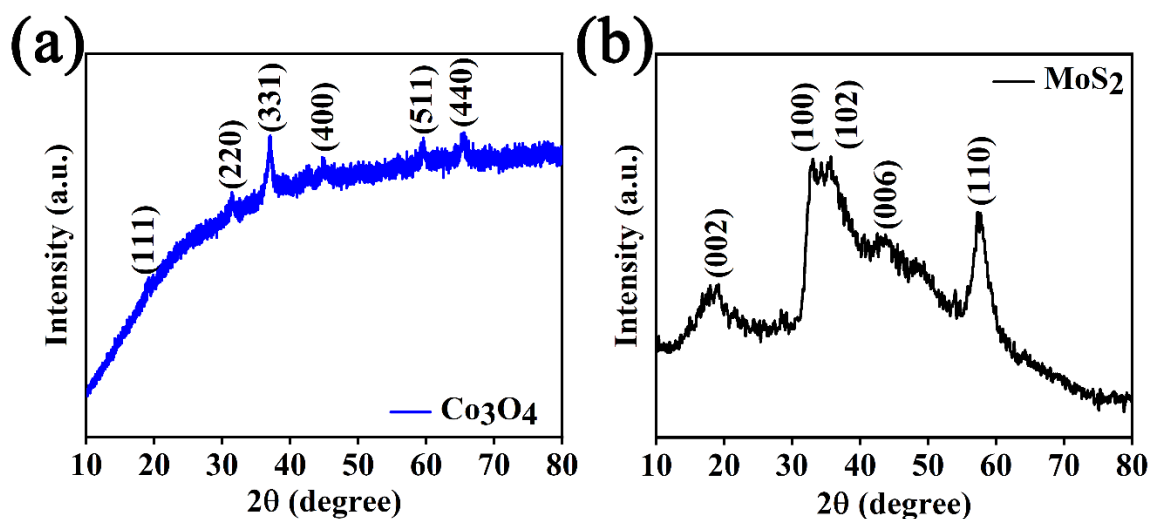

**Fig. S1** XRD pattern of the pristine  $\text{Co}_3\text{O}_4$  and  $\text{MoS}_2$ .

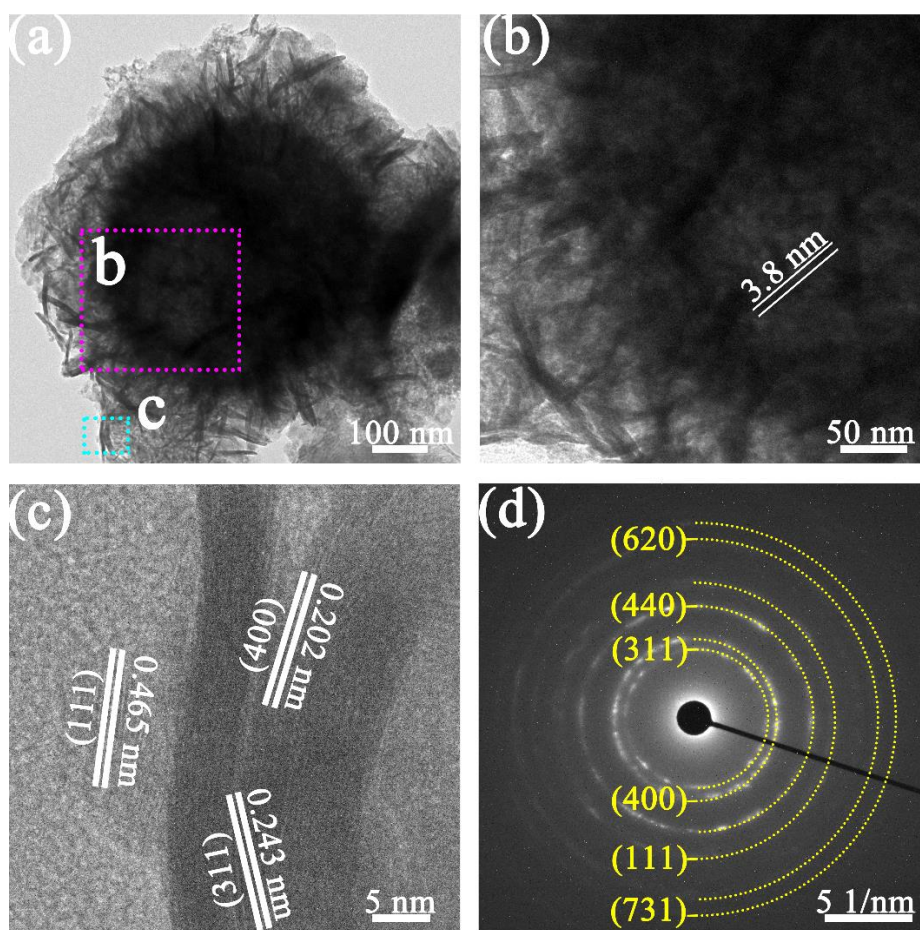

**Fig. S2** (a-c) TEM and HRTEM image of pure  $\text{Co}_3\text{O}_4$ , The selected area electron diffraction (SAED) also proved the coexistence of three different crystalline phases in  $\text{Co}_3\text{O}_4$

**Table S1.** The comparison of present work on Co<sub>3</sub>O<sub>4</sub>-CoS<sub>2</sub>@MoS<sub>2</sub> with the reported literatures.

| Materials                                                                      | Gas             | W. T.<br>(°C) | Gas<br>Conc.<br>(ppm) | T <sub>res</sub> /T <sub>rec</sub> | Sensitivity<br>(R <sub>a</sub> /R <sub>g</sub> ) | LOD<br>(ppm) | Ref                  |
|--------------------------------------------------------------------------------|-----------------|---------------|-----------------------|------------------------------------|--------------------------------------------------|--------------|----------------------|
| <b>This Work</b>                                                               | NO <sub>2</sub> | RT            | <b>100</b>            | <b>3.4s/54.4s</b>                  | <b>39.6<sup>②</sup></b>                          | <b>0.01</b>  | <b>This<br/>Work</b> |
| Carbon Dots-<br>WO <sub>3</sub>                                                | NO <sub>2</sub> | RT            | 5                     | 5s/376s                            | 2.13 <sup>①</sup>                                | 200ppb       | [1]                  |
| S-doped SnO <sub>2</sub>                                                       | NO <sub>2</sub> | RT            | 5                     | 27s/32s                            | 10.7 <sup>②</sup>                                | 0.0018       | [2]                  |
| MoS <sub>2</sub> -bilayer                                                      | NO <sub>2</sub> | RT            | 10                    | --                                 | 21% <sup>①</sup>                                 | ---          | [3]                  |
| n-MoS <sub>2</sub> /p-GaN                                                      | NO <sub>2</sub> | RT            | 50                    | 272s/612s                          | 98.42% <sup>①</sup>                              | --           | [4]                  |
| MoS <sub>2</sub> /SnO <sub>2</sub>                                             | NO <sub>2</sub> | RT            | 250                   | --                                 | 18.7 <sup>②</sup>                                | 5            | [5]                  |
| CeO <sub>2</sub> -Graphene                                                     | NO <sub>2</sub> | 136           | 200                   | 250s/2590s                         | 33 <sup>②</sup>                                  | --           | [6]                  |
| SnS <sub>2</sub> /SnSe <sub>2</sub>                                            | NO <sub>2</sub> | RT            | 2                     | --                                 | 699.2% <sup>①</sup>                              | --           | [7]                  |
| Co <sub>3</sub> O <sub>4</sub> /rGO                                            | NO <sub>2</sub> | RT            | 5                     | 900s/--                            | 26.8% <sup>①</sup>                               | 0.05         | [8]                  |
| n-SnO <sub>2</sub> /p-Co <sub>3</sub> O <sub>4</sub>                           | NO <sub>2</sub> | 300           | 10                    | --                                 | 129.8% <sup>①</sup>                              | 2            | [9]                  |
| α-Fe <sub>2</sub> O <sub>3</sub> /Co <sub>3</sub> O <sub>4</sub> -5<br>min-rGO | NO <sub>2</sub> | 130           | 2                     | 44s/50s                            | 17.64 <sup>②</sup>                               | 0.44ppb      | [10]                 |

W.T.: Working temperature; LOD: limit of detection; RT: Room temperature.

①:  $S = |R_a - R_g| / R_a \times 100\%$  or  $S = |R_g - R_a| / R_a \times 100\%$

②:  $S = R_a / R_g$

**Table S2** Parameters obtained by fitting experimental curve to equivalent circuit

| Raw materials                                                        | R1 ( $\Omega$ )     | C1 (F)                  | R2 ( $\Omega$ )     | C2 (F)                  |
|----------------------------------------------------------------------|---------------------|-------------------------|---------------------|-------------------------|
| <b>Co<sub>3</sub>O<sub>4</sub>-CoS<sub>2</sub>@MoS<sub>2</sub>-1</b> | $1.224 \times 10^5$ | $4.712 \times 10^{-11}$ | $1.161 \times 10^6$ | $4.534 \times 10^{-10}$ |
| <b>Co<sub>3</sub>O<sub>4</sub>-CoS<sub>2</sub>@MoS<sub>2</sub>-2</b> | $1.276 \times 10^5$ | $6.804 \times 10^{-11}$ | $3.248 \times 10^5$ | $3.844 \times 10^{-11}$ |
| <b>Co<sub>3</sub>O<sub>4</sub>-CoS<sub>2</sub>@MoS<sub>2</sub>-3</b> | $1.805 \times 10^5$ | $1.019 \times 10^{-11}$ | $1.323 \times 10^6$ | $2.137 \times 10^{10}$  |
| <b>Co<sub>3</sub>O<sub>4</sub></b>                                   | $3.148 \times 10^7$ | $1.045 \times 10^{12}$  | $6.805 \times 10^7$ | $3.828 \times 10^{-10}$ |

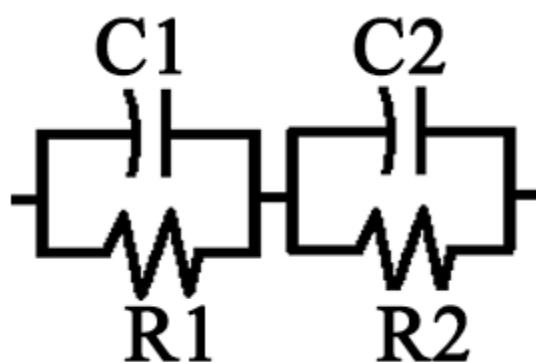

**Fig. S3** The equivalent circuit model used to interpret the EIS data

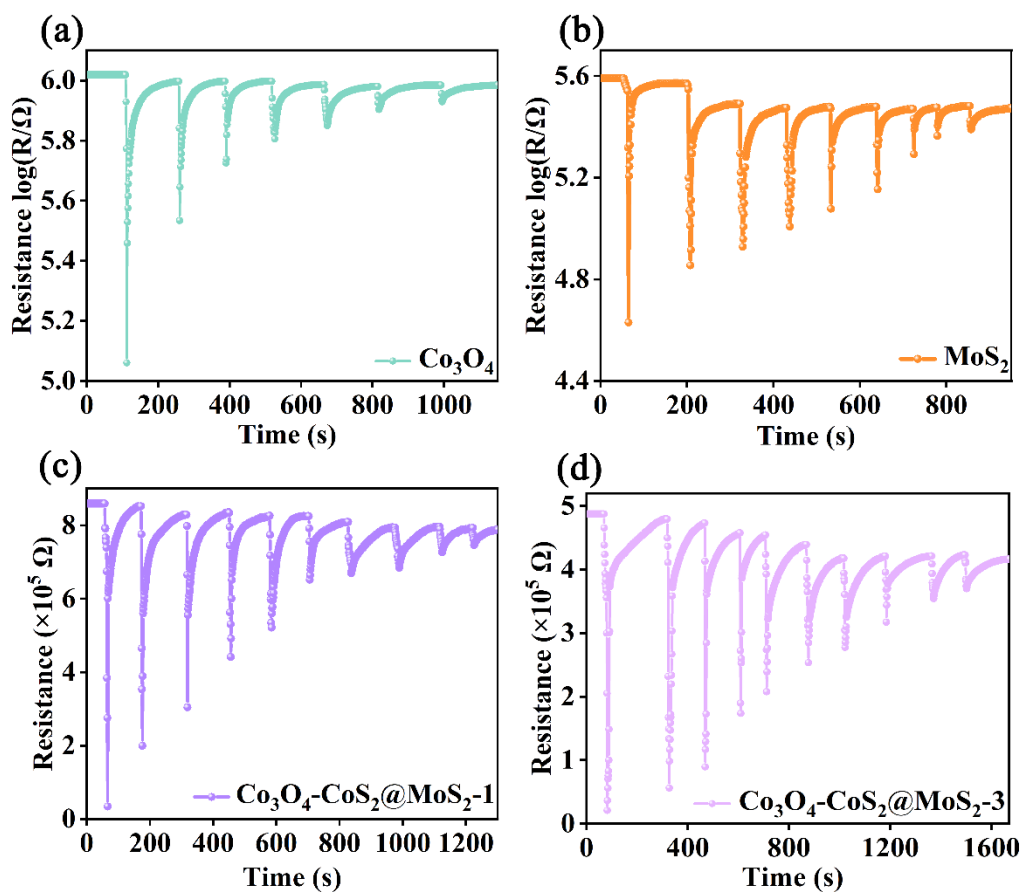

**Fig. S4** Dynamic response-recovery time curves of (a)  $\text{Co}_3\text{O}_4$ ; (b)  $\text{Co}_3\text{O}_4@\text{CoS}_2@\text{MoS}_2$ -1; (c)  $\text{Co}_3\text{O}_4@\text{CoS}_2@\text{MoS}_2$ -3; (d)  $\text{MoS}_2$  (RT = 25 °C, RH= 25 %).

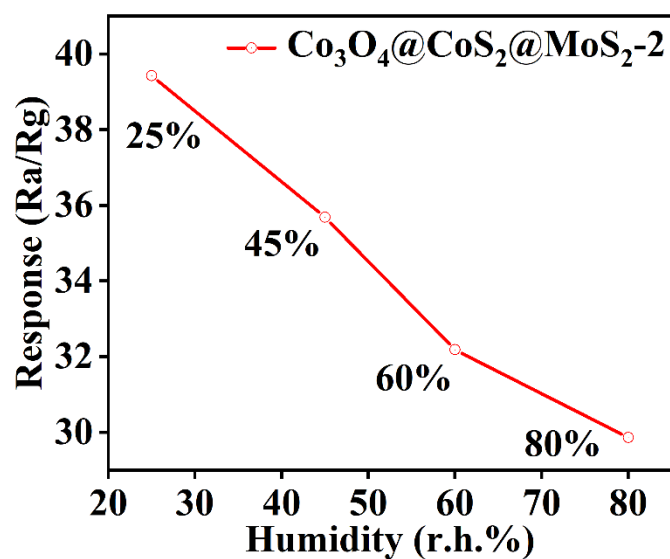

**Fig. S5** Response value of  $\text{Co}_3\text{O}_4-\text{CoS}_2@\text{MoS}_2$ -2 sensor at different humidity conditions.

### Calculation for limit of detection (LOD):

The sensor noise was calculated using the variation in the relative sensor response in the baseline using the root-mean-square deviation (rms). According to the Eq. (1) below, and  $S_i$  and  $S$  obtained by the polynomial fit method in Fig. S10,  $Vx^2$  can be gathered as followed [11].

$$Vx^2 = \Sigma(S_i - S)^2 \quad (1)$$

The sensor noise is 0.0003 according to the Eq. (2) and the theoretical detection limit (for signal-to-noise ratio of 3) is approximately 12 ppb according to the Eq. (3).

$$rms = \sqrt{Vx^2/N} \quad (N = 30) \quad (2)$$

$$LOD = 3 * (rms/slope) \quad (3)$$

Therefore, the theoretical detection limit of 1.8 ppb to NO<sub>2</sub> at RT.

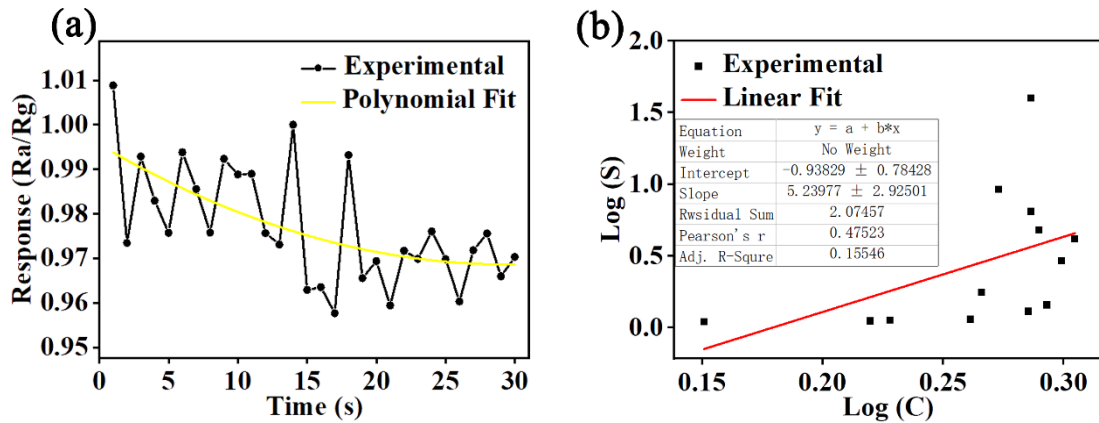

**Fig. S6** (a) The curve obtained by fifth-order polynomial fitting the first 30 response points in the response-time baseline of the Co<sub>3</sub>O<sub>4</sub>-CoS<sub>2</sub>@MoS<sub>2</sub>-2 sensor before the injection of NO<sub>2</sub>. The response values before and after fitting are recorded as  $Y_i$  and  $Y$ , respectively; (b) the curve with detailed data obtained by linear fitting the response points in the NO<sub>2</sub> sensing measurement of Fig. 4a.



**Table S3** Response, response time and recovery time of  $\text{Co}_3\text{O}_4@\text{CoS}_2@\text{MoS}_2$  sensors at room temperature (RT=25 °C, RH 25%).

| Sample      | $\text{Co}_3\text{O}_4\text{-CoS}_2@\text{MoS}_2\text{-1}$ |       |       | $\text{Co}_3\text{O}_4\text{-CoS}_2@\text{MoS}_2\text{-2}$ |       |       | $\text{Co}_3\text{O}_4\text{-CoS}_2@\text{MoS}_2\text{-3}$ |       |       | $\text{Co}_3\text{O}_4$ |       |       |
|-------------|------------------------------------------------------------|-------|-------|------------------------------------------------------------|-------|-------|------------------------------------------------------------|-------|-------|-------------------------|-------|-------|
|             | $\text{NO}_2(\text{ppm})$                                  | S     | T/s   | Tr/s                                                       | S     | T/s   | Tr/s                                                       | S     | T/s   | Tr/s                    | S     | T/s   |
| <b>100</b>  | 30.16                                                      | 7.05  | 60.04 | 39.6                                                       | 3.42  | 54.40 | 33.51                                                      | 6.40  | 57.32 | 9.08                    | 9.39  | 75.87 |
| <b>50</b>   | 24.27                                                      | 10.20 | 55.88 | 30.21                                                      | 7.21  | 50.00 | 28.55                                                      | 9.80  | 54.21 | 2.90                    | 15.52 | 67.70 |
| <b>30</b>   | 22.72                                                      | 14.37 | 52.78 | 26.45                                                      | 11.20 | 46.00 | 25.30                                                      | 13.38 | 47.22 | 1.87                    | 17.94 | 59.30 |
| <b>10</b>   | 21.89                                                      | 18.04 | 51.56 | 24.79                                                      | 15.00 | 35.60 | 22.64                                                      | 17.56 | 44.20 | 1.56                    | 29.68 | 53.54 |
| <b>5</b>    | 11.58                                                      | 27.52 | 49.34 | 14.16                                                      | 19.00 | 24.00 | 12.19                                                      | 25.59 | 31.00 | 1.37                    | 34.56 | 41.09 |
| <b>3</b>    | 10.27                                                      | 34.00 | 43.30 | 12.92                                                      | 29.40 | 22.00 | 11.73                                                      | 27.94 | 26.38 | 1.19                    | 38.98 | 32.00 |
| <b>1</b>    | 9.17                                                       | 38.30 | 32.04 | 11.76                                                      | 35.00 | 20.00 | 10.51                                                      | 37.12 | 22.00 | 1.13                    | 41.12 | 25.00 |
| <b>0.5</b>  | 7.16                                                       | 48.33 | 27.00 | 10.44                                                      | 38.00 | 18.60 | 8.33                                                       | 45.00 | 19.40 |                         |       |       |
| <b>0.3</b>  | 5.10                                                       | 50.40 | 20.67 | 8.30                                                       | 40.40 | 15.00 | 6.19                                                       | 49.80 | 17.30 |                         |       |       |
| <b>0.1</b>  | 3.06                                                       | 60.80 | 18.73 | 5.14                                                       | 46.00 | 10.90 | 4.14                                                       | 58.65 | 15.00 |                         |       |       |
| <b>0.05</b> | 1.87                                                       | 70.87 | 14.90 | 3.13                                                       | 52.20 | 9.00  | 2.51                                                       | 66.32 | 10.00 |                         |       |       |
| <b>0.03</b> | --                                                         | --    | --    | 1.21                                                       | 56.60 | 5.60  |                                                            |       |       |                         |       |       |

\*S: Response     $T_s$ : Response time     $T_r$ : Recovery time

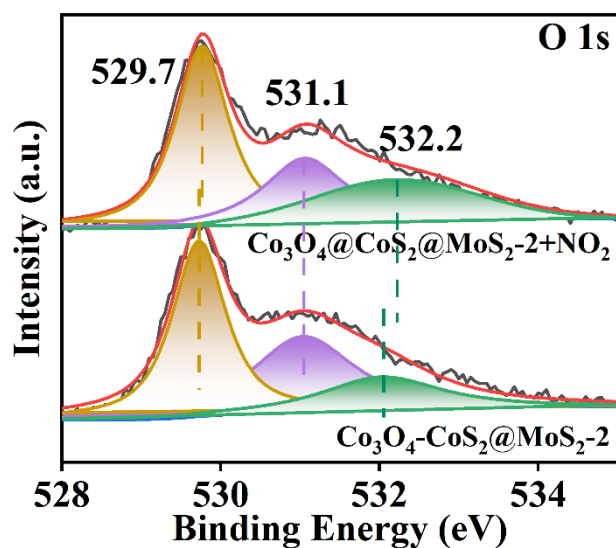

**Fig. S7** XPS spectra of  $\text{Co}_3\text{O}_4\text{-CoS}_2\text{@MoS}_2\text{-2}$  in air and after  $\text{NO}_2$  adsorption at RT

**Table S4** O1s peak position and peak area ratio (%) of  $\text{Co}_3\text{O}_4\text{-CoS}_2\text{@MoS}_2\text{-2}$  and  $\text{Co}_3\text{O}_4\text{-CoS}_2\text{@MoS}_2\text{-2+NO}_2$  samples.

O<sub>l</sub>: lattice oxygen; O<sub>v</sub>: oxygen vacancy; O<sub>c</sub>: chemisorbed oxygen

| Sample<br>Peak         | $\text{Co}_3\text{O}_4\text{-CoS}_2\text{@MoS}_2\text{-2}$ |                |                | $\text{Co}_3\text{O}_4\text{-CoS}_2\text{@MoS}_2\text{-2+NO}_2$ |                |                |
|------------------------|------------------------------------------------------------|----------------|----------------|-----------------------------------------------------------------|----------------|----------------|
|                        | O <sub>l</sub>                                             | O <sub>v</sub> | O <sub>c</sub> | O <sub>l</sub>                                                  | O <sub>v</sub> | O <sub>c</sub> |
| Binding energy<br>(eV) | 529.73                                                     | 531.04         | 532.03         | 529.76                                                          | 531.05         | 532.2          |
| Peak area ratio<br>(%) | 49.42                                                      | 26.29          | 24.24          | 45.49                                                           | 36.45          | 17.85          |

$\text{Co}_3\text{O}_4\text{-CoS}_2\text{@MoS}_2\text{-2+NO}_2$ : Fresh  $\text{Co}_3\text{O}_4\text{-CoS}_2\text{@MoS}_2\text{-2}$  adsorption  $\text{NO}_2$  for 1 h at RT.

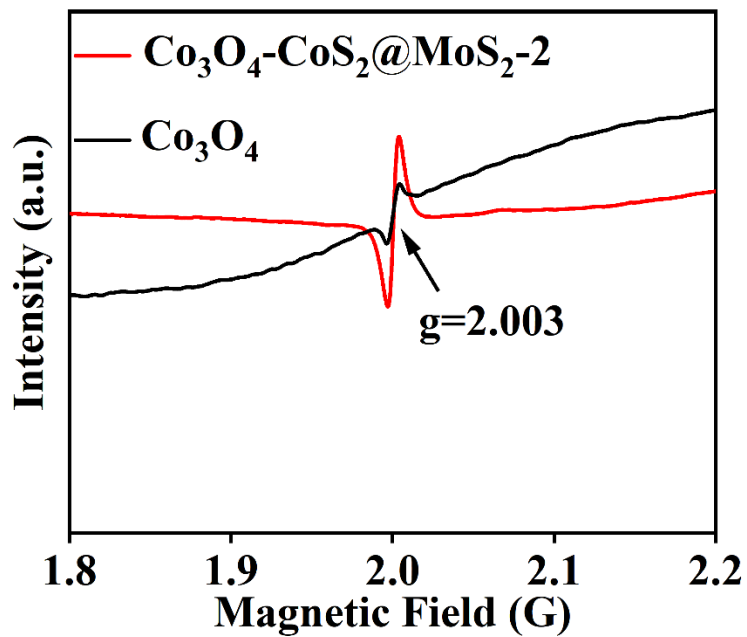

Fig. S8 EPR spectra of  $\text{Co}_3\text{O}_4\text{-CoS}_2\text{@MoS}_2\text{-2}$  and  $\text{Co}_3\text{O}_4$

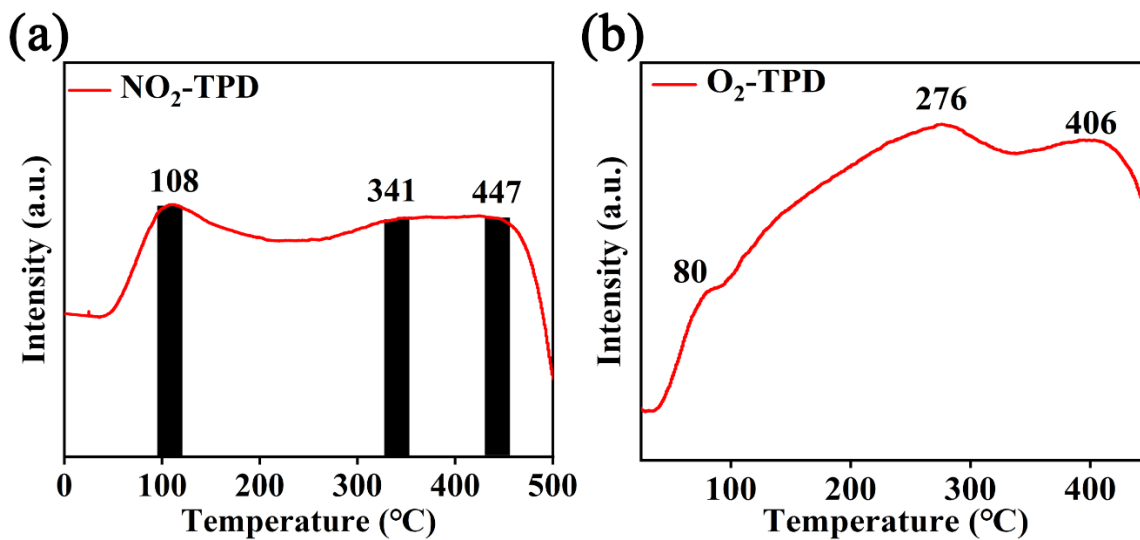

Fig. S9  $\text{O}_2$ -TPD and  $\text{NO}_2$ -TPD of  $\text{Co}_3\text{O}_4\text{-CoS}_2\text{@MoS}_2\text{-2}$  composite

## References

- [1] W. Bian, H. Dou, X. Wang, C. Li, Y. Zhang, C. Gong, N. Sun, S. Liu, P. Li, Q. Jing, B. Liu, Fabrication and Computational Study of a Chemiresistive NO<sub>2</sub> Gas Sensor Based on the Carbon Dots-WO<sub>3</sub> Heterostructure for Operating below Room Temperature, *ACS Sens*, 8 (2023) 748-756.
- [2] P. Wang, W. Ge, L. Lin, X. Jia, X. Zhang, J. Lu, S-doped SnO<sub>2</sub> derived from SnS nanoparticles for highly sensitive NO<sub>2</sub> detection at room temperature, *Journal of Alloys and Compounds*, 953 (2023).
- [3] M. Qi, Z. Huang, H. Zheng, L. Zhao, R. Jiang, J. Wang, J. Hu, G. Chen, S. Jia, J. Wang, Layer-Dependent NO<sub>2</sub>-Sensing Performance in MoS<sub>2</sub> for Room-Temperature Monitoring, *ACS Applied Nano Materials*, 6 (2023) 9290-9297.
- [4] M. Reddeppa, B.-G. Park, G. Murali, S.H. Choi, N.D. Chinh, D. Kim, W. Yang, M.-D. Kim, NO<sub>x</sub> gas sensors based on layer-transferred n-MoS<sub>2</sub>/p-GaN heterojunction at room temperature: Study of UV light illuminations and humidity, *Sensors and Actuators B: Chemical*, 308 (2020).
- [5] Y. Han, Y. Ma, Y. Liu, S. Xu, X. Chen, M. Zeng, N. Hu, Y. Su, Z. Zhou, Z. Yang, Construction of MoS<sub>2</sub>/SnO<sub>2</sub> heterostructures for sensitive NO<sub>2</sub> detection at room temperature, *Applied Surface Science*, 493 (2019) 613-619.
- [6] L. Zhang, H. Xu, Y. Huang, H. Lu, T. Ai, K. Xu, F. Ma, P.K. Chu, Polar Cubic CeO<sub>2</sub> Nanoparticles on Graphene for Enhanced Room-Temperature NO<sub>2</sub> Sensing Performance, *ACS Applied Nano Materials*, 6 (2023) 10551-10558.
- [7] R. Wu, K. Yan, J. Zhao, Z. Cai, S. Jian, L. Qiu, 2D/2D SnS<sub>2</sub>/SnSe<sub>2</sub> van der Waals heterostructure for highly sensitive room-temperature NO<sub>2</sub> sensor: Key role of interface contact, *Chemical Engineering Journal*, 466 (2023).
- [8] B. Zhang, M. Cheng, G. Liu, Y. Gao, L. Zhao, S. Li, Y. Wang, F. Liu, X. Liang, T. Zhang, G. Lu, Room temperature NO<sub>2</sub> gas sensor based on porous Co<sub>3</sub>O<sub>4</sub> slices/reduced graphene oxide hybrid, *Sensors and Actuators B: Chemical*, 263 (2018) 387-399.
- [9] Y.J. Kwon, H.G. Na, S.Y. Kang, M.S. Choi, J.H. Bang, T.W. Kim, A. Mirzaei, H.W. Kim, Attachment of Co<sub>3</sub>O<sub>4</sub> layer to SnO<sub>2</sub> nanowires for enhanced gas sensing properties, *Sensors and Actuators B: Chemical*, 239 (2017) 180-192.
- [10] L. Sun, J. Sun, K. Zhang, X. Sun, S. Bai, Y. Zhao, R. Luo, D. Li, A. Chen, rGO functionalized  $\alpha$ -Fe<sub>2</sub>O<sub>3</sub>/Co<sub>3</sub>O<sub>4</sub> heterojunction for NO<sub>2</sub> detection, *Sensors and Actuators B: Chemical*, 354 (2022).

[11] J. Fan, L. Jiang, H. Lv, F. Qin, Y. Fan, J. Wang, M. Ikram, K. Shi, ZIF-67/BiOCl nanocomposites for highly efficient detection of NO<sub>2</sub> gas at room temperature, *Journal of Materials Chemistry A*, 11 (2023) 15370-15379.
